# Supplementary material
Source: MDPI journal article supplement (https://www.mdpi.com/2071-1050/14/6/3149)

# Household Solid Waste Management in the Dominican Republic: Case of the Municipality of Puñal, Santiago

Supplementary Figures

Edian F. Franco, Wilfredo Padrón Iglesia and Karina Pérez Teruel

# S1-Education Level

■ Uninformed   ■ No School   ■ Less than a high school diploma   ■ High school diploma   ■ Some college, no degree   ■ Bachelor's degree

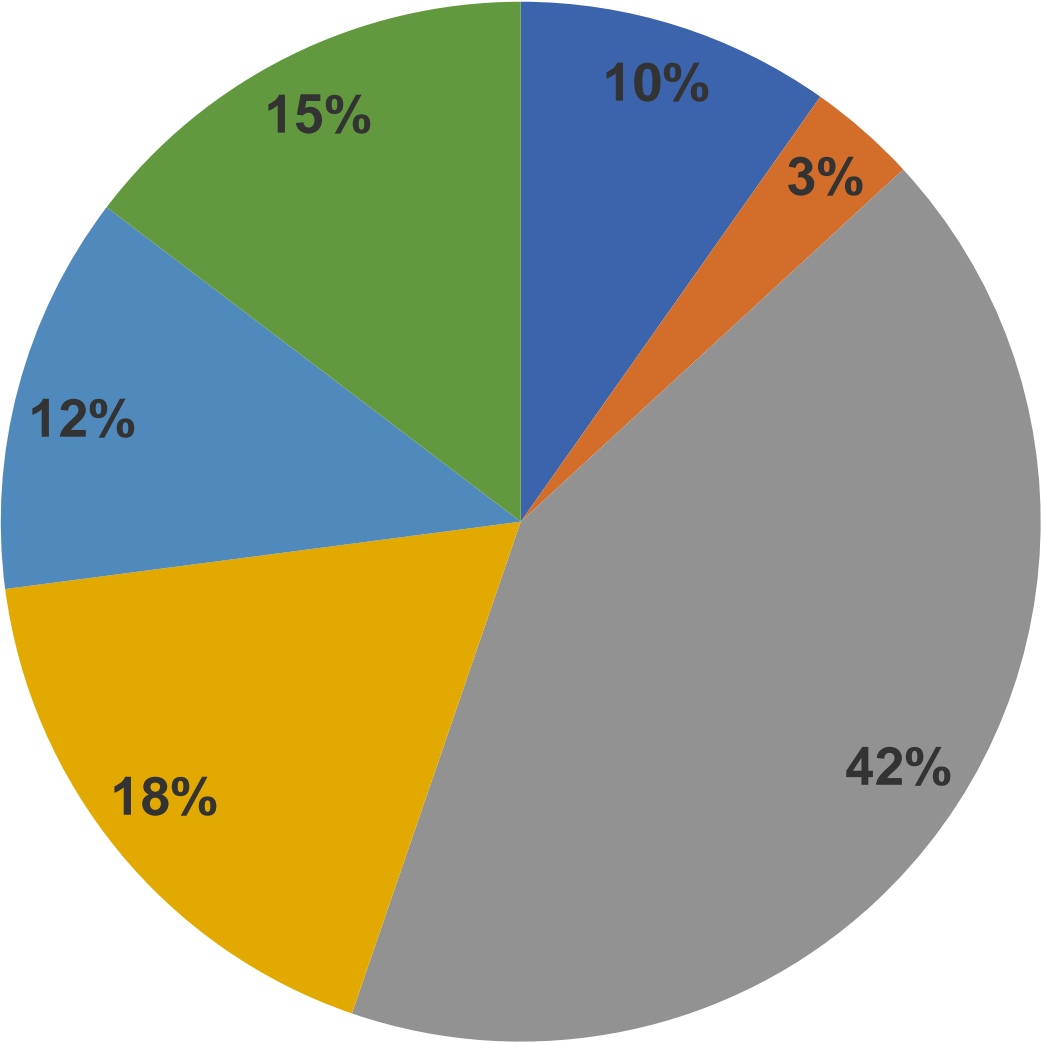

**S2-Would you like to receive a benefit or bonus for your solid waste?**

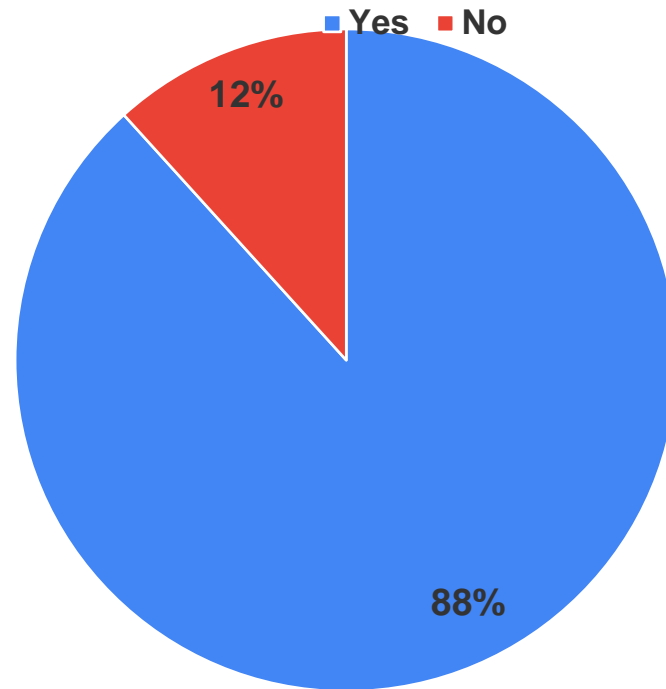

### S3-Would you be willing to participate in a waste recycling program?

■ No ■ I dont know ■ Yes

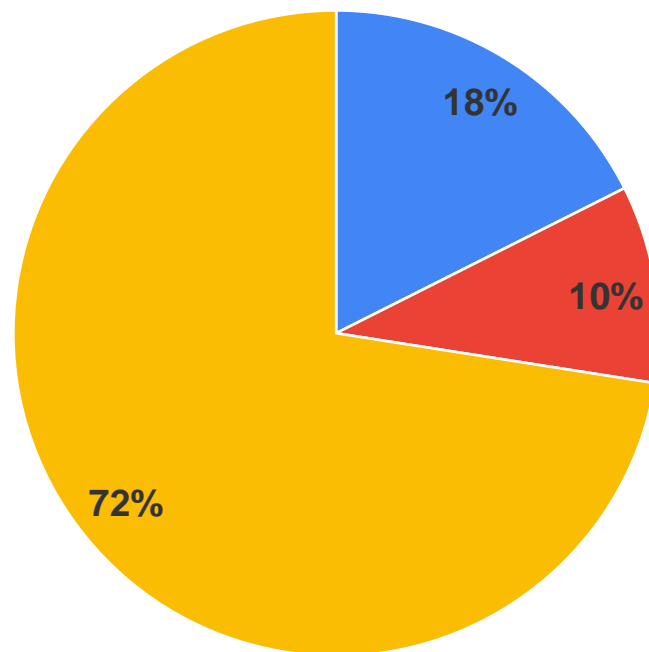

**S4-Why do you think garbage dumps or pockets are generated in your neighborhoods / city?**

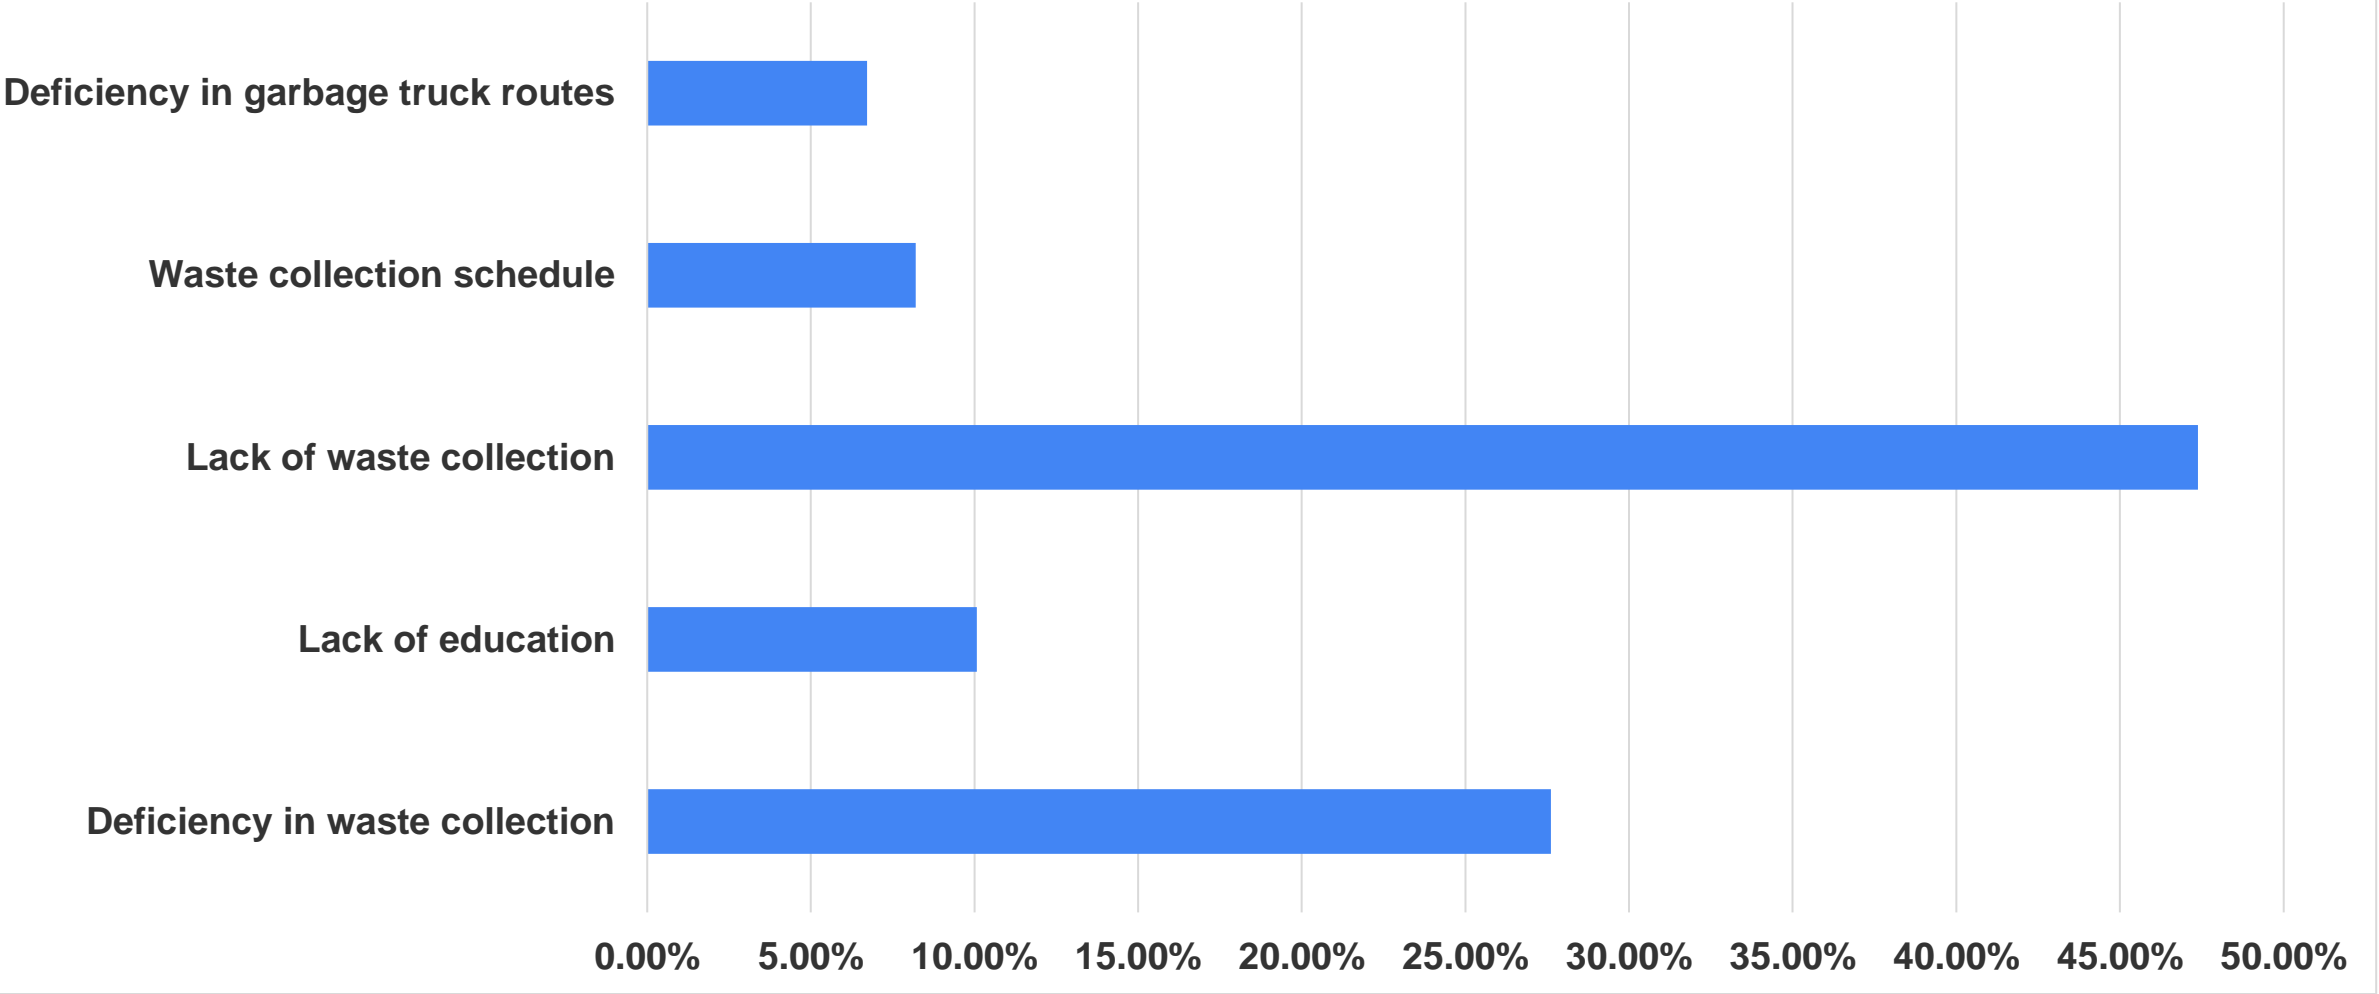

#### S4-How is the collection of solid waste carried out in your residence?

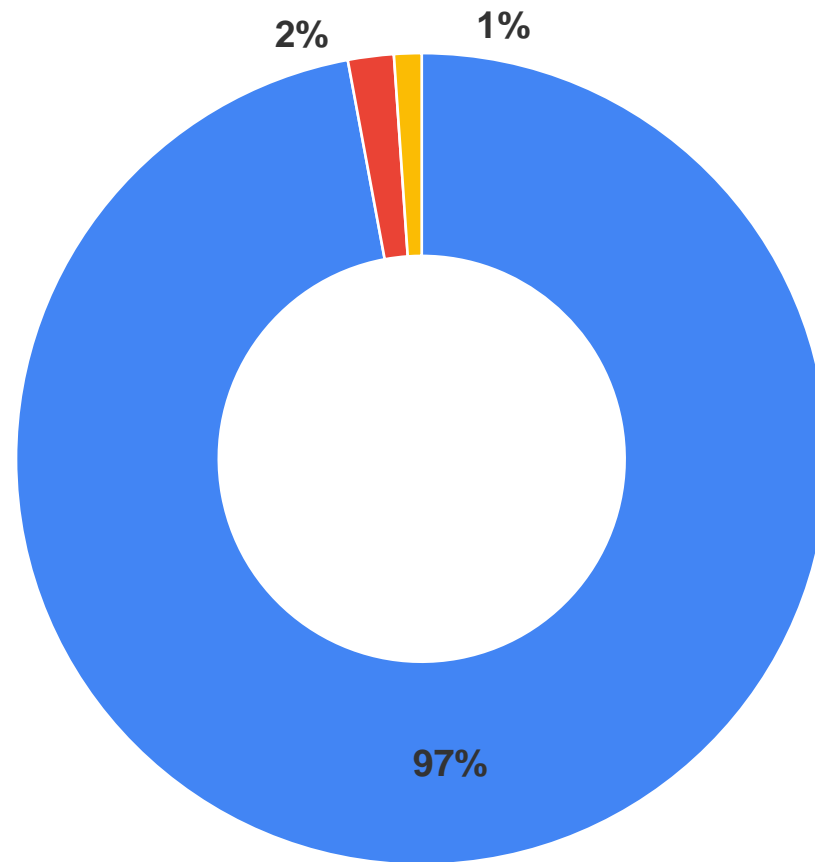

■ The municipal service (garbage truck)

■ Informal waste disposal service

■ Garbage incineration

### S5-What type of use do you give organic waste (food)?

■ Discarded in the garbage truck   ■ Animal food   ■ Fertilizer for plants

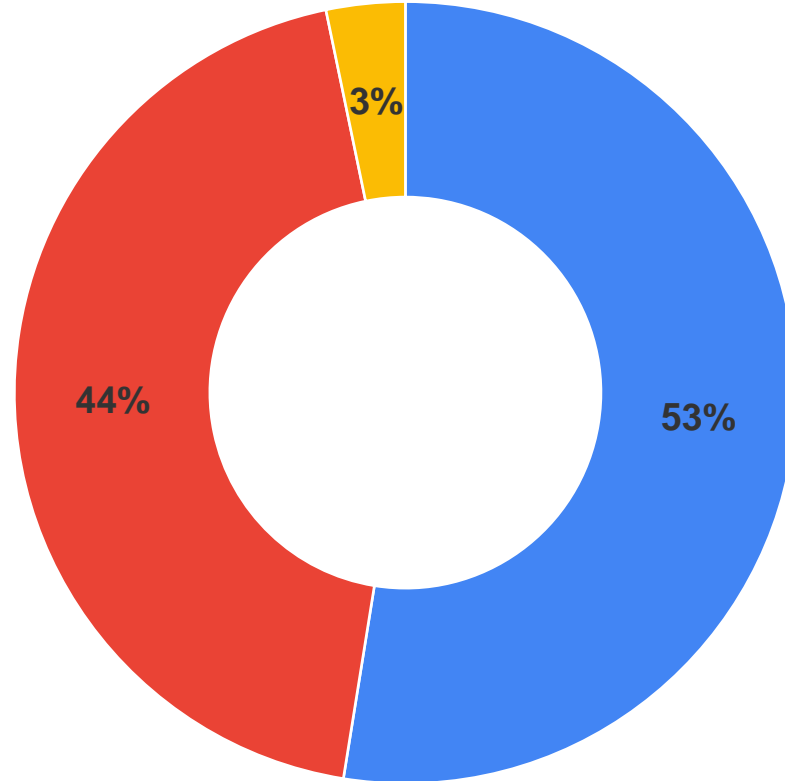

Supplement: s1 [file s1]
